# Supplementary material for: circACTA2 mediates Ang II-induced VSMC senescence by modulation of the interaction of ILF3 with CDK4 mRNA
Source: publisher site journal article supplement (doi:10.18632/aging.202855), 2021-04-22
Supplement: Supplementary file [file aging-v13i8-202855-supplementary-material-SD1.pdf]

SUPPLEMENTARY FIGURES

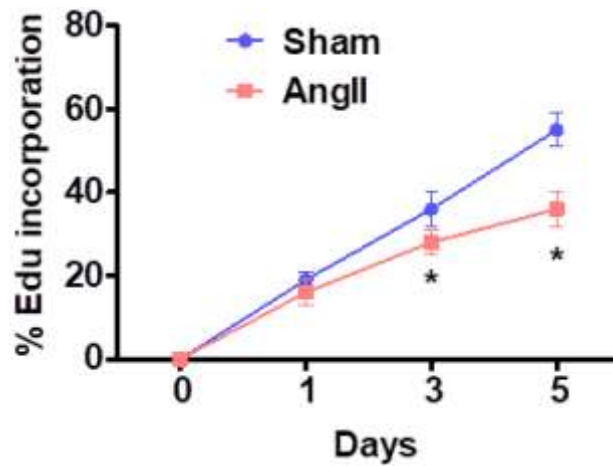

Supplementary Figure 1. EdU incorporation assay in VSMCs treated with Sham (vehicle) or Ang II for different times. \* $P < 0.05$  vs. Sham;  $n = 5$ .

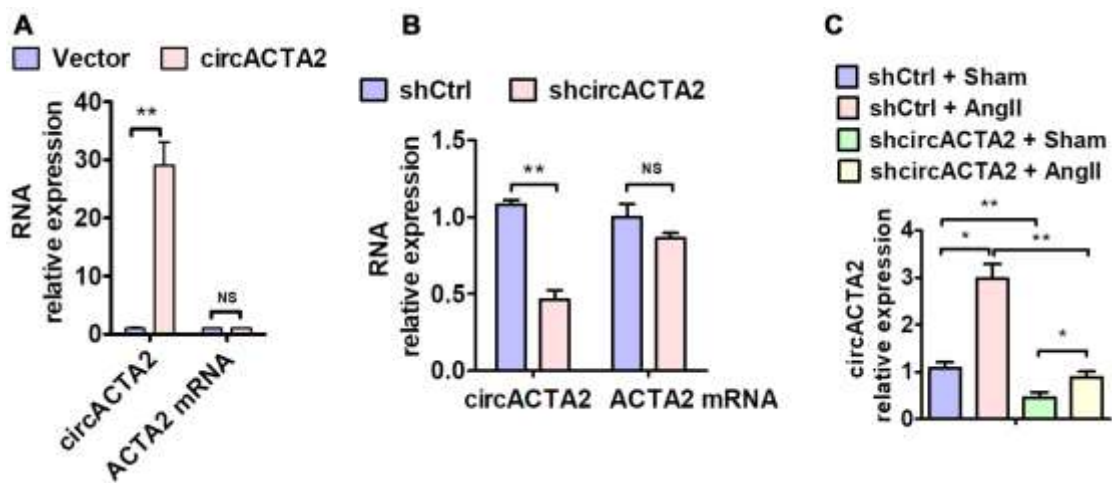

Supplementary Figure 2. (A) RT-qPCR detected circACTA2 and ACTA2 mRNA expression in VSMCs transfected with empty vector or circACTA2 expression vectors. (B) VSMCs were transfected with shCtrl or shcircACTA2 vector, and circACTA2 and ACTA2 mRNA expression was detected by RT-qPCR. (C) RT-qPCR detected circACTA2 expression in VSMCs treated as indicated. \* $P < 0.05$ , \*\* $P < 0.01$  vs. their corresponding control.

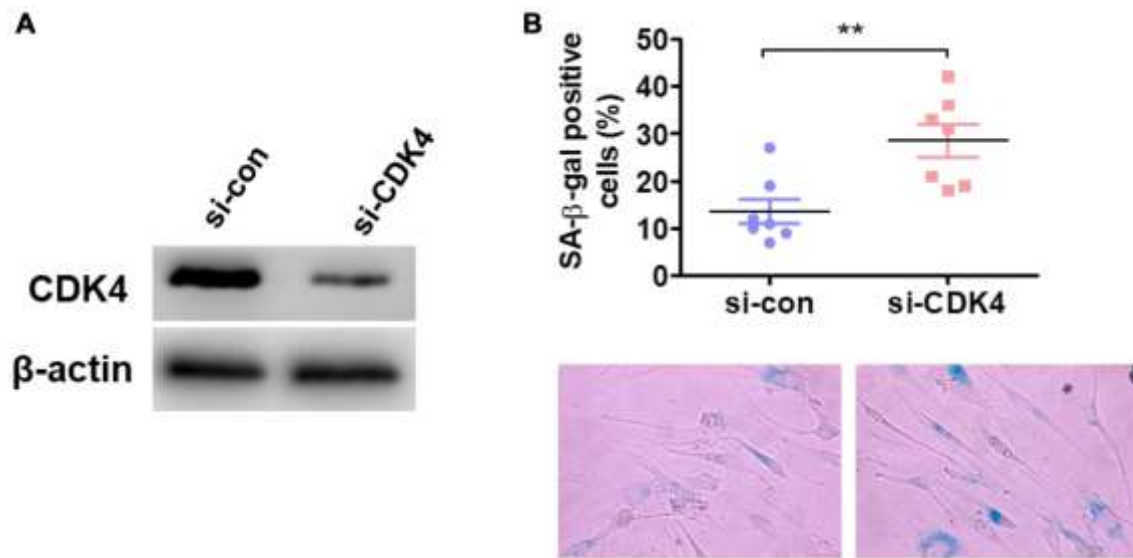

**Supplementary Figure 3. Knockdown of CDK4 induces senescence of VSMCs.** (A) Western blot detected the expression of CDK4 in VSMCs transfected with si-CDK4 or si-con for 48 h. (B) SA-β-gal activity in VSMCs transfected with si-con or si-CDK4. The percentage of SA-β-gal positive cells (above) and representative pictures (below) are shown. Magnification × 400. \*\* $P < 0.01$  vs. vehicle control.

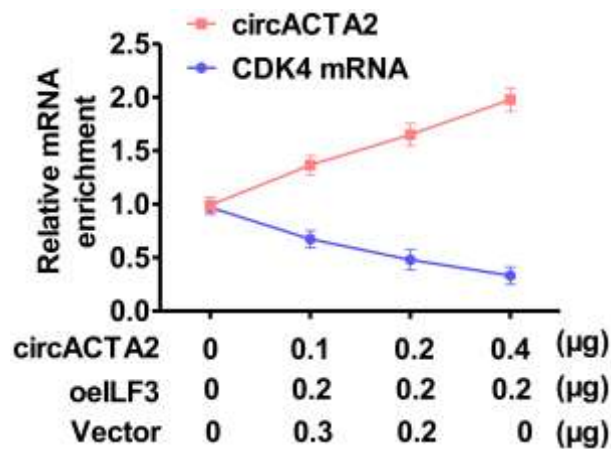

**Supplementary Figure 4. RIP-PCR detected circACTA2 competition with CDK4 mRNA for binding with ILF3.** VSMCs were co-transfected with increasing amounts of circACTA2 expression plasmids and a constant amount of ILF3-expressing vector, and then anti-ILF3 antibody was used to immunoprecipitate RNAs binding to ILF3. PCR detected the enrichment of circACTA2 and CDK4 mRNA in the anti-ILF3 immunoprecipitates.
